# Supplementary material
Source: publisher figshare collection journal article supplement (https://acs.figshare.com/ndownloader/files/4595686)
Supplement: Supplementary file 1 [file 4595686]

# Synthesis and characterization of aluminium fluoride hydrate with cationic vacancies: structure, thermal stability and acidic properties

*D. Dambournet, A. Demourgues, C. Martineau, E. Durand, J. Majimel, C. Legein, J.-Y. Buzaré,*

*F. Fayon, A. Vimont, H. Leclerc and A. Tressaud*

## Supporting information

### *Table of contents*

|                                                                                                                                                                                                                                                                                                                          |    |
|--------------------------------------------------------------------------------------------------------------------------------------------------------------------------------------------------------------------------------------------------------------------------------------------------------------------------|----|
| <b>Figure 1.</b> $^1\text{H}$ MAS (30 kHz) NMR spectrum of $\text{Al}_{0.82}\square_{0.18}\text{F}_{2.46}(\text{H}_2\text{O})_{0.54}$ after annealing at 773 K during 24 h under Ar.....                                                                                                                                 | S2 |
| <b>Figure 2.</b> Experimental and calculated $^{19}\text{F}$ MAS (30 kHz) NMR spectra of $\text{Al}_{0.82}\square_{0.18}\text{F}_{2.46}(\text{H}_2\text{O})_{0.54}$ after annealing at 773 K during 24 h under Ar.....                                                                                                   | S2 |
| <b>Table 1.</b> Isotropic chemical shift $\delta_{\text{iso}}$ (ppm), line width (ppm) and relative intensity (%) as deduced from the reconstruction of the $^{19}\text{F}$ NMR spectrum of $\text{Al}_{0.82}\square_{0.18}\text{F}_{2.46}(\text{H}_2\text{O})_{0.54}$ after annealing at 773 K during 24h under Ar..... | S3 |
| <b>Figure 3.</b> $^{27}\text{Al}$ MAS (30 kHz) one pulse NMR spectrum recorded at 17.6 T of (a) $\text{Al}_{0.82}\square_{0.18}\text{F}_{2.46}(\text{H}_2\text{O})_{0.54}$ and (b) $\text{Al}_{0.82}\square_{0.18}\text{F}_{2.46}(\text{H}_2\text{O})_{0.54}$ after annealing at 773 K during 24 h under Ar.....         | S3 |
| <b>Figure 4.</b> $^{27}\text{Al}$ MAS (25 kHz) one pulse NMR spectrum of $\text{Al}_{0.82}\square_{0.18}\text{F}_{2.46}(\text{H}_2\text{O})_{0.54}$ recorded at 7 T. Central transition is presented in the inset.....                                                                                                   | S4 |
| <b>Figure 5.</b> Experimental and calculated central transitions of the $^{27}\text{Al}$ MAS (30 kHz) NMR spectrum recorded at 17.6 T of $\text{Al}_{0.82}\square_{0.18}\text{F}_{2.46}(\text{H}_2\text{O})_{0.54}$ after annealing at 773 K during 24 h under Ar.....                                                   | S4 |

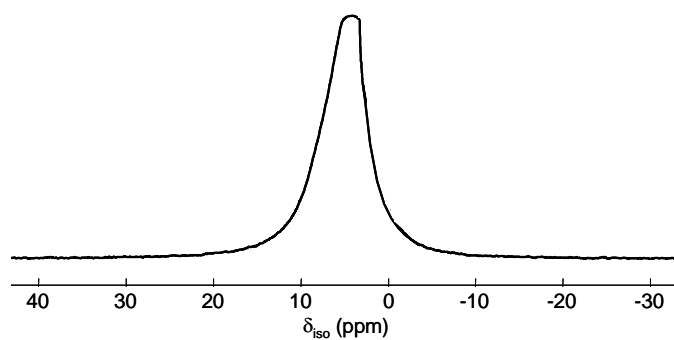

**Figure 1.**  $^1\text{H}$  MAS (30 kHz) NMR spectrum of  $\text{Al}_{0.82}\square_{0.18}\text{F}_{2.46}(\text{H}_2\text{O})_{0.54}$  after annealing at 773 K during 24 h under Ar.

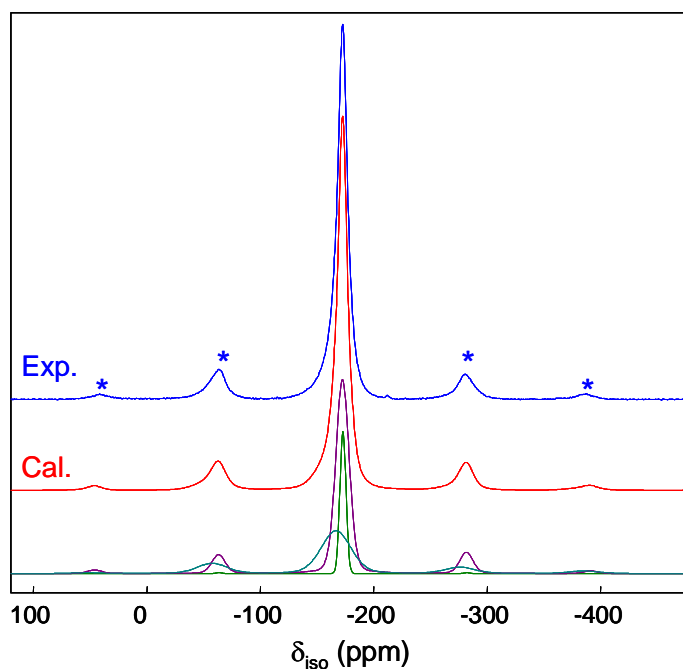

**Figure 2.** Experimental and calculated  $^{19}\text{F}$  MAS (30 kHz) NMR spectra of  $\text{Al}_{0.82}\square_{0.18}\text{F}_{2.46}(\text{H}_2\text{O})_{0.54}$  after annealing at 773 K during 24 h under Ar. The star symbols indicate the spinning sidebands. The three individual contributions to the reconstructed spectrum are shown.

**Table 1.** Isotropic chemical shift  $\delta_{\text{iso}}$  (ppm), line width (ppm) and relative intensity (%) as deduced from the reconstruction of the  $^{19}\text{F}$  NMR spectrum of  $\text{Al}_{0.82}\square_{0.18}\text{F}_{2.46}(\text{H}_2\text{O})_{0.54}$  after annealing at 773 K during 24h under Ar.

| Line | $\delta_{\text{iso}}$ ( $\pm 0.5$ ) | Width ( $\pm 0.5$ ) | Intensity ( $\pm 0.5$ ) |
|------|-------------------------------------|---------------------|-------------------------|
| 1    | -172.9                              | 6.3                 | 13.7                    |
| 2    | -172.5                              | 13.9                | 54.8                    |
| 3    | -166.8                              | 30.9                | 31.5                    |

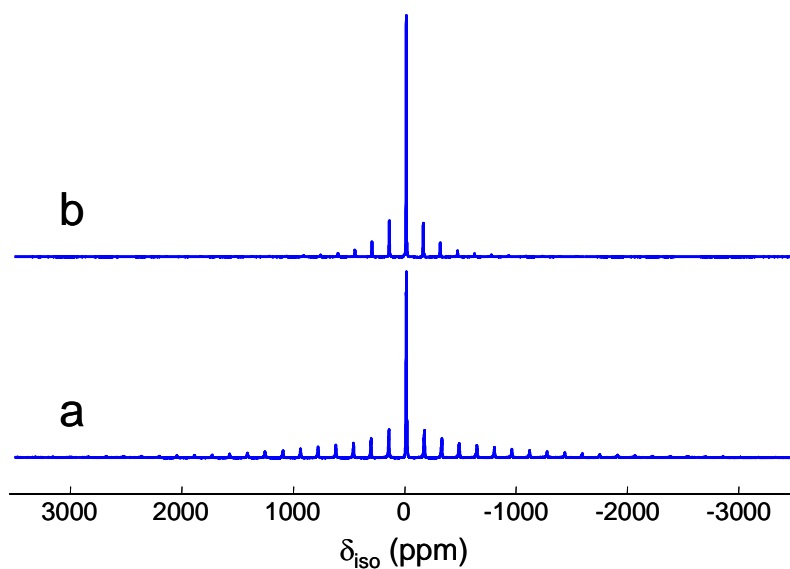

**Figure 3.**  $^{27}\text{Al}$  MAS (30 kHz) one pulse NMR spectrum recorded at 17.6 T of (a)  $\text{Al}_{0.82}\square_{0.18}\text{F}_{2.46}(\text{H}_2\text{O})_{0.54}$  and (b)  $\text{Al}_{0.82}\square_{0.18}\text{F}_{2.46}(\text{H}_2\text{O})_{0.54}$  after annealing at 773 K during 24 h under Ar.

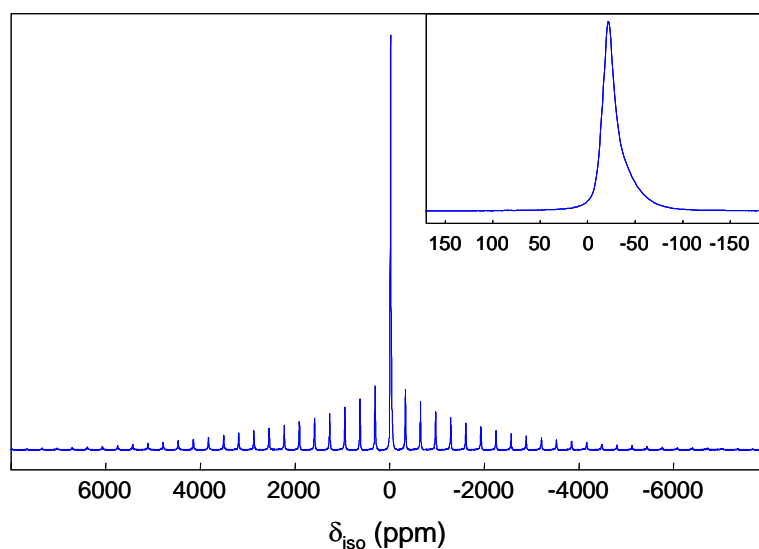

**Figure 4.**  $^{27}\text{Al}$  MAS (25 kHz) one pulse NMR spectrum of  $\text{Al}_{0.82}\square_{0.18}\text{F}_{2.46}(\text{H}_2\text{O})_{0.54}$  recorded at 7 T. Central transition is presented in the inset.

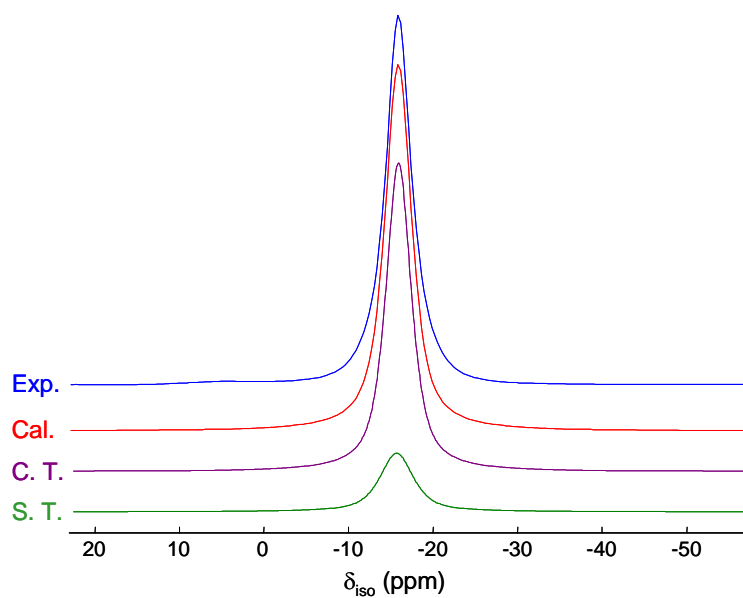

**Figure 5.** Experimental and calculated central transitions of the  $^{27}\text{Al}$  MAS (30 kHz) NMR spectrum recorded at 17.6 T of  $\text{Al}_{0.82}\square_{0.18}\text{F}_{2.46}(\text{H}_2\text{O})_{0.54}$  after annealing at 773 K during 24 h under Ar. The fitting takes into account the  $N = 0$  band of both the satellite transitions (S. T.)  $\langle 3/2 \rangle$  and the central transition (C. T.)  $\langle 1/2 \rangle$  and leads to the following parameters:  $\delta_{\text{iso}} = -15.9 (\pm 0.2)$  ppm and  $\nu_{\text{Q}\eta} = 140 (\pm 20)$  kHz.
